# Supplementary material for: Transboundary cooperation in infrastructure operation generates economic and environmental co-benefits to the Lancang-Mekong River Basin
Source: Research Square preprint supplement (doi:10.21203/rs.3.rs-1956096/v2), 2022-12-08
Supplement: Supplementary file 1 [file 3121b2c6cc2d339cabb1349a.pdf]

## Reporting Summary

Nature Portfolio wishes to improve the reproducibility of the work that we publish. This form provides structure for consistency and transparency in reporting. For further information on Nature Portfolio policies, see our [Editorial Policies](#) and the [Editorial Policy Checklist](#).

### Statistics

For all statistical analyses, confirm that the following items are present in the figure legend, table legend, main text, or Methods section.

n/a Confirmed

- ☐ ☒ The exact sample size ( $n$ ) for each experimental group/condition, given as a discrete number and unit of measurement
- ☐ ☒ A statement on whether measurements were taken from distinct samples or whether the same sample was measured repeatedly
- ☐ ☒ The statistical test(s) used AND whether they are one- or two-sided  
*Only common tests should be described solely by name; describe more complex techniques in the Methods section.*
- ☐ ☒ A description of all covariates tested
- ☐ ☒ A description of any assumptions or corrections, such as tests of normality and adjustment for multiple comparisons
- ☐ ☒ A full description of the statistical parameters including central tendency (e.g. means) or other basic estimates (e.g. regression coefficient) AND variation (e.g. standard deviation) or associated estimates of uncertainty (e.g. confidence intervals)
- ☐ ☒ For null hypothesis testing, the test statistic (e.g.  $F$ ,  $t$ ,  $r$ ) with confidence intervals, effect sizes, degrees of freedom and  $P$  value noted  
*Give  $P$  values as exact values whenever suitable.*
- ☐ ☒ For Bayesian analysis, information on the choice of priors and Markov chain Monte Carlo settings
- ☐ ☒ For hierarchical and complex designs, identification of the appropriate level for tests and full reporting of outcomes
- ☐ ☒ Estimates of effect sizes (e.g. Cohen's  $d$ , Pearson's  $r$ ), indicating how they were calculated

*Our web collection on [statistics for biologists](#) contains articles on many of the points above.*

### Software and code

Policy information about [availability of computer code](#)

Data collection All codes used in this study can be provided by the corresponding author upon request.

Data analysis All codes used in this study can be provided by the corresponding author upon request.

For manuscripts utilizing custom algorithms or software that are central to the research but not yet described in published literature, software must be made available to editors and reviewers. We strongly encourage code deposition in a community repository (e.g. GitHub). See the Nature Portfolio [guidelines for submitting code & software](#) for further information.

### Data

Policy information about [availability of data](#)

All manuscripts must include a [data availability statement](#). This statement should provide the following information, where applicable:

- Accession codes, unique identifiers, or web links for publicly available datasets
- A description of any restrictions on data availability
- For clinical datasets or third party data, please ensure that the statement adheres to our [policy](#)

All data needed to replicate our results are available in the article, on-line or the supplementary information.

## Human research participants

Policy information about [studies involving human research participants and Sex and Gender in Research](#).

|                             |                                              |
|-----------------------------|----------------------------------------------|
| Reporting on sex and gender | <input type="text" value="Does not apply."/> |
| Population characteristics  | <input type="text" value="Does not apply."/> |
| Recruitment                 | <input type="text" value="Does not apply."/> |
| Ethics oversight            | <input type="text" value="Does not apply."/> |

Note that full information on the approval of the study protocol must also be provided in the manuscript.

## Field-specific reporting

Please select the one below that is the best fit for your research. If you are not sure, read the appropriate sections before making your selection.

☐ Life sciences    ☐ Behavioural & social sciences    ☒ Ecological, evolutionary & environmental sciences

For a reference copy of the document with all sections, see [nature.com/documents/nr-reporting-summary-flat.pdf](https://www.nature.com/documents/nr-reporting-summary-flat.pdf)

## Ecological, evolutionary & environmental sciences study design

All studies must disclose on these points even when the disclosure is negative.

|                          |                                                                                                                                                                                                                                                                 |
|--------------------------|-----------------------------------------------------------------------------------------------------------------------------------------------------------------------------------------------------------------------------------------------------------------|
| Study description        | <input type="text" value="We quantify how and to what extent transboundary cooperation generate economic and environmental co-benefits by jointly using a coupled simulation-optimization approach and cooperative game theoretical analysis."/>                |
| Research sample          | <input type="text" value="The Lancang-Mekong River basin (LMRB) is chosen as research sample to test this idea."/>                                                                                                                                              |
| Sampling strategy        | <input type="text" value="LMRB is chosen due to its blooming water resources infrastructure development and long-term transboundary conflicts between economic and environmental goals of riparian countries."/>                                                |
| Data collection          | <input type="text" value="Data are collected from published papers and books, websites, and management agencies. The collected data are checked and recorded by authors."/>                                                                                     |
| Timing and spatial scale | <input type="text" value="Historical daily flow data, water infrastructure data, social-economic data, climate change scenario data cover a range from 1980 to 2050 at basin scale. The details of the timing and spatial scale are given in the manuscript."/> |
| Data exclusions          | <input type="text" value="No data were excluded from the analysis."/>                                                                                                                                                                                           |
| Reproducibility          | <input type="text" value="All codes and data used in this study can be provided by the corresponding author upon request to verify the reproducibility of the results."/>                                                                                       |
| Randomization            | <input type="text" value="Samples were not allocation to groups in this paper, so no randomization exists."/>                                                                                                                                                   |
| Blinding                 | <input type="text" value="Blinding was not relevant to this study because the is a research focusing on real-world river basin system."/>                                                                                                                       |

Did the study involve field work?    ☐ Yes    ☒ No

## Reporting for specific materials, systems and methods

We require information from authors about some types of materials, experimental systems and methods used in many studies. Here, indicate whether each material, system or method listed is relevant to your study. If you are not sure if a list item applies to your research, read the appropriate section before selecting a response.

Materials & experimental systems

|                                     |                                                        |
|-------------------------------------|--------------------------------------------------------|
| n/a                                 | Involvement in the study                               |
| <input checked="" type="checkbox"/> | <input type="checkbox"/> Antibodies                    |
| <input checked="" type="checkbox"/> | <input type="checkbox"/> Eukaryotic cell lines         |
| <input checked="" type="checkbox"/> | <input type="checkbox"/> Palaeontology and archaeology |
| <input checked="" type="checkbox"/> | <input type="checkbox"/> Animals and other organisms   |
| <input checked="" type="checkbox"/> | <input type="checkbox"/> Clinical data                 |
| <input checked="" type="checkbox"/> | <input type="checkbox"/> Dual use research of concern  |

Methods

|                                     |                                                 |
|-------------------------------------|-------------------------------------------------|
| n/a                                 | Involvement in the study                        |
| <input checked="" type="checkbox"/> | <input type="checkbox"/> ChIP-seq               |
| <input checked="" type="checkbox"/> | <input type="checkbox"/> Flow cytometry         |
| <input checked="" type="checkbox"/> | <input type="checkbox"/> MRI-based neuroimaging |
